# Supplementary material for: Improvement of the versatility of an arabinofuranosidase against galactofuranose for the synthesis of galactofuranoconjugates
Source: Royal Society of Chemistry journal article supplement (doi:10.1039/c9ob01162e), 2019-01-01

**Supporting information**

**Improvement of the versatility of an arabinofuranosidase  
against galactofuranose for the synthesis of  
galactofuranoconjugates**

Quentin Pavic<sup>a</sup>, Aline Pillot<sup>a</sup>, Olivier Tasseau<sup>a</sup>, Laurent Legentil<sup>a</sup>, and Sylvain Tranchimand<sup>a\*</sup>

<sup>a</sup> Univ Rennes, Ecole Nationale Supérieure de Chimie de Rennes, CNRS, ISCR – UMR 6226, F-35000  
Rennes, France  
Tel: (+33)-223-238096, e-mail: sylvain.tranchimand@ensc-rennes.fr

## List of supplementary information

**Table S1:** Primers used for saturation site-directed mutagenesis at positions 29, 319 and 357, and for point mutation at position 173.

**Figure S1:** Hydrogen bond networks of the complexes *pNP- $\alpha$ -L-arabinofuranoside/CtAra51* (A) and *pNP- $\beta$ -D-galactofuranoside/CtAra51* (B) after docking.

**Figure S2:** Screening against *pNP- $\beta$ -D-galactofuranoside* hydrolysis of the banks of mutants. A: L319X bank. B: L29X bank. C: I357X bank.

**Figure S3:** Docking of *pNP- $\beta$ -D-galactofuranoside* in the active site of *CtAra51* WT (A); *CtAra51* L319V (B) and *CtAra51* L29V (C).

**Figure S4:** Hydrogen bond networks of the complexes *pNP- $\beta$ -D-galactofuranoside/CtAra51* L319V (A) and *pNP- $\beta$ -D-galactofuranoside/CtAra51* L29V (B) after a 10 ns MD.

**Figure S5:** NMR traces over time of the transglycosylation reaction using the L319V mutant (A), the L29V mutant (B) or the WT enzyme (C) as the biocatalyst.

**Figure S6:** NMR traces over time of the acylation reaction using the E173 L319V double mutant (A), the E173 L29V double mutant (B) or the E173A mutant (C) as the biocatalyst.

**Figure S7:** NMR traces over time of the thioligation reaction using the E173A L319V double mutant (A), the E173 L29V double mutant (B) or the E173A mutant (C) as the biocatalyst.

$^1\text{H}$  and  $^{13}\text{C}$  NMR spectrum of isolated ethyl galactofuranoside **4**, *p*-methoxybenzoyl galactofuranose **6** and thiophenyl galactofuranoside **7**.

| Mutation         | Primer                                                        |
|------------------|---------------------------------------------------------------|
| <b>Leu29X</b>    | 5'- GGCTCTTTTGTAGAACAT <b>TNN</b> NGGAAGGGCCGTATATGACGG -3'   |
| <b>Leu319X</b>   | 5'- GGAGAATAGCGCCTCCTTT <b>TANN</b> NGAGGATATATATACGTTTG -3'  |
| <b>Ile357X</b>   | 5'- CTGGCACAGTTGATTAATGT <b>ANN</b> NGCGCCTATTGTGACTGAAAG -3' |
| <b>Glu173Ala</b> | 5'- GGTGTCTTGGCAAT <b>GCC</b> ATGGACGGTCCG-3'                 |

**Table S1:** Primers used for saturation site-directed mutagenesis at positions 29, 319 and 357, and for point mutation at position 173. Mutated codon is indicated in bold. Indicated primers and their reverse-complements were used for the mutagenesis reactions.

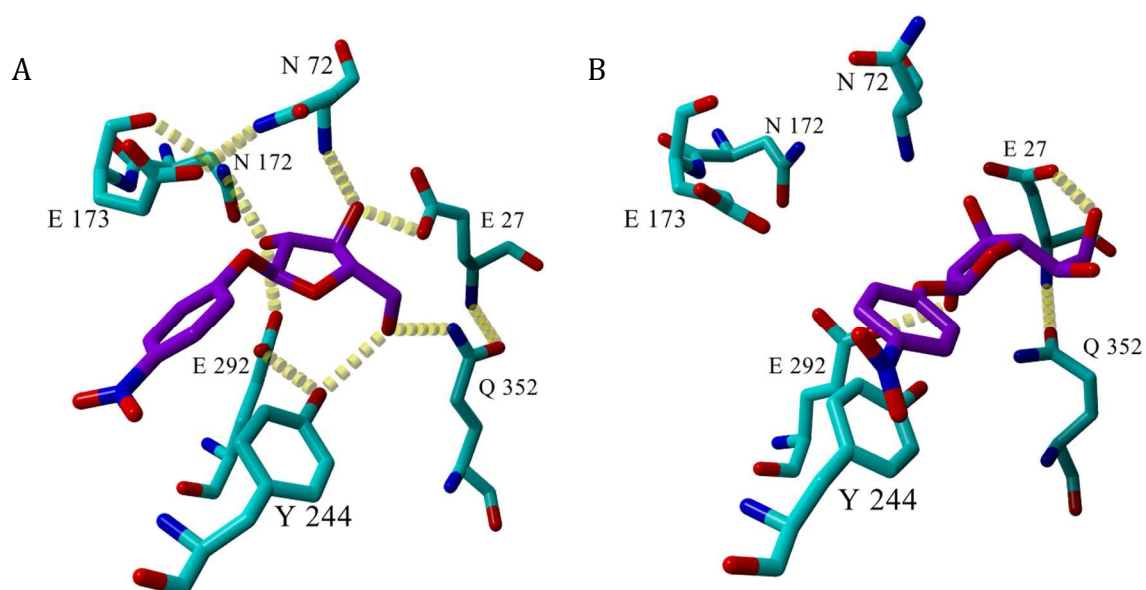

**Figure S1.** Hydrogen bond networks of the complexes *pNP-α-L-arabinofuranoside/CtAraf51* (A) and *pNP-β-D-galactofuranoside/CtAraf51* (B) after docking.

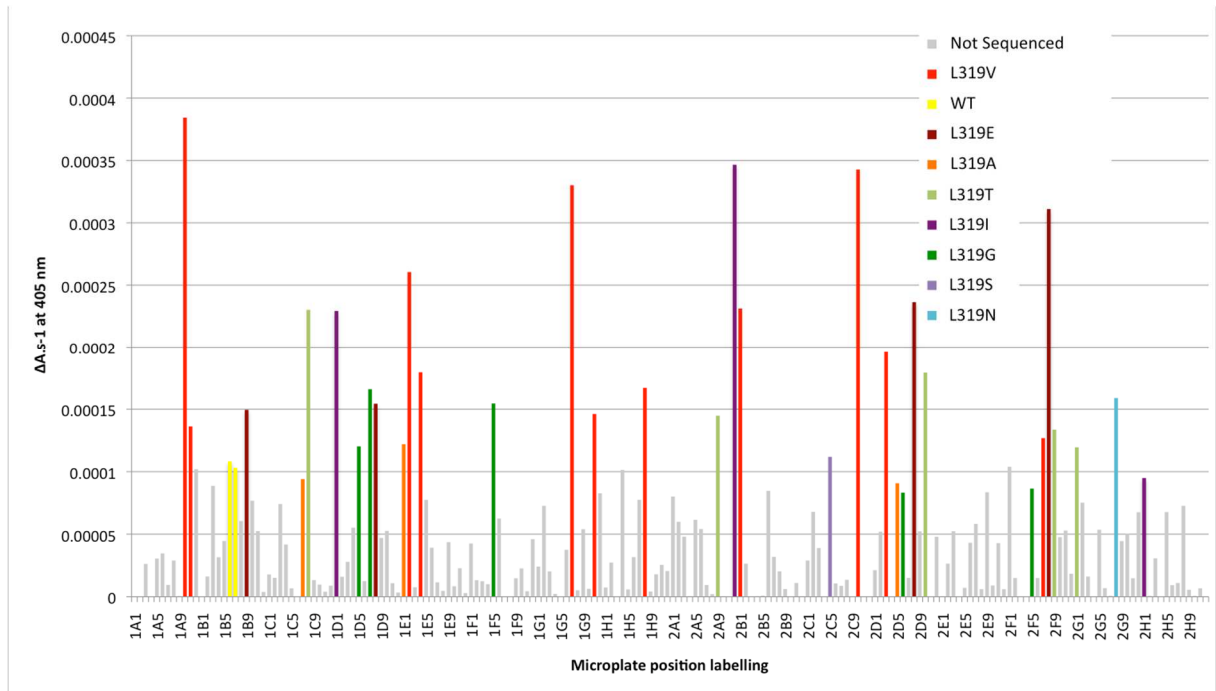

**Figure S2A.** Screening against *pNP*- $\beta$ -D-galactofuranoside hydrolysis of the L319X bank. Activities are reported as the slopes of the kinetic measurement at 405 nm over 30 min at 25°C and pH 7.

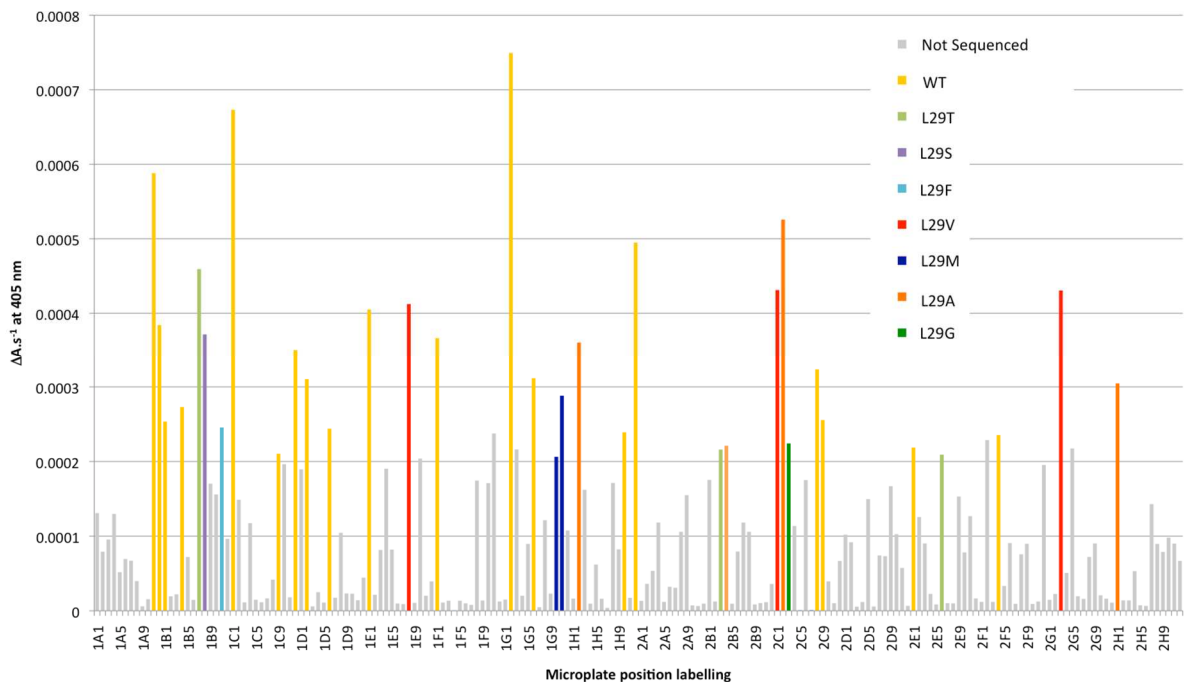

**Figure S2B.** Screening against *pNP*- $\beta$ -D-galactofuranoside hydrolysis of the L29X bank. Activities are reported as the slopes of the kinetic measurement at 405 nm over 30 min at 25°C and pH 7.

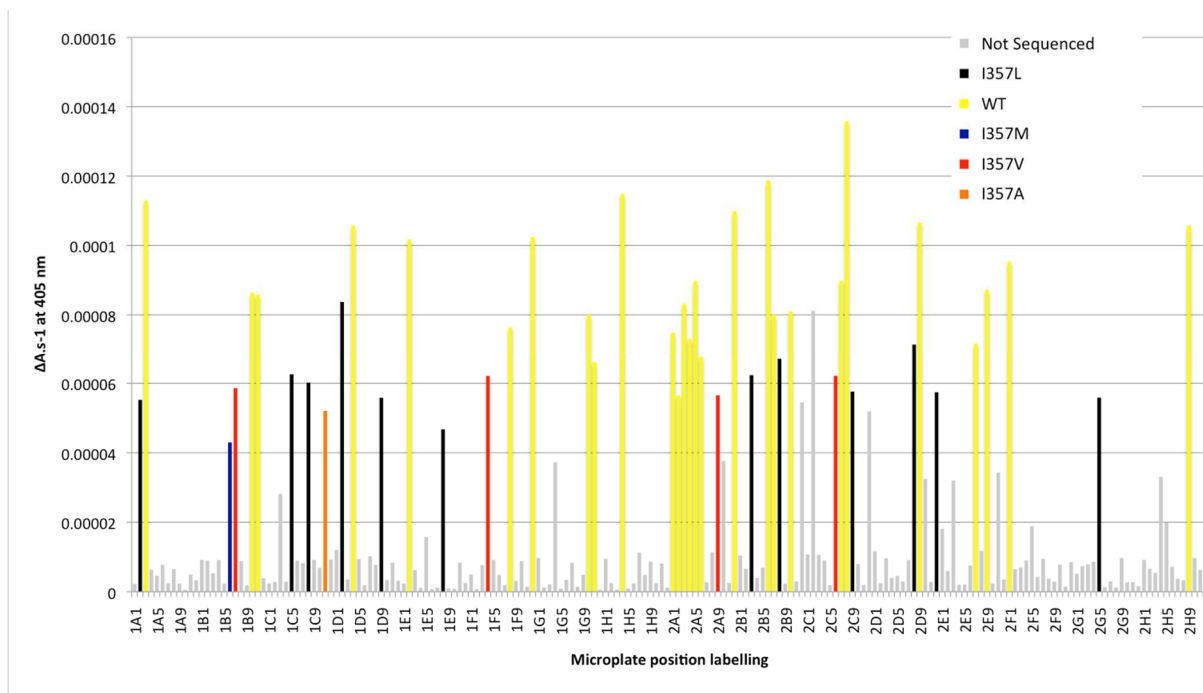

**Figure S2C.** Screening against *pNP*-β-D-galactofuranoside hydrolysis of the I357X bank. Activities are reported as the slopes of the kinetic measurement at 405 nm over 30 min at 25°C and pH 7.

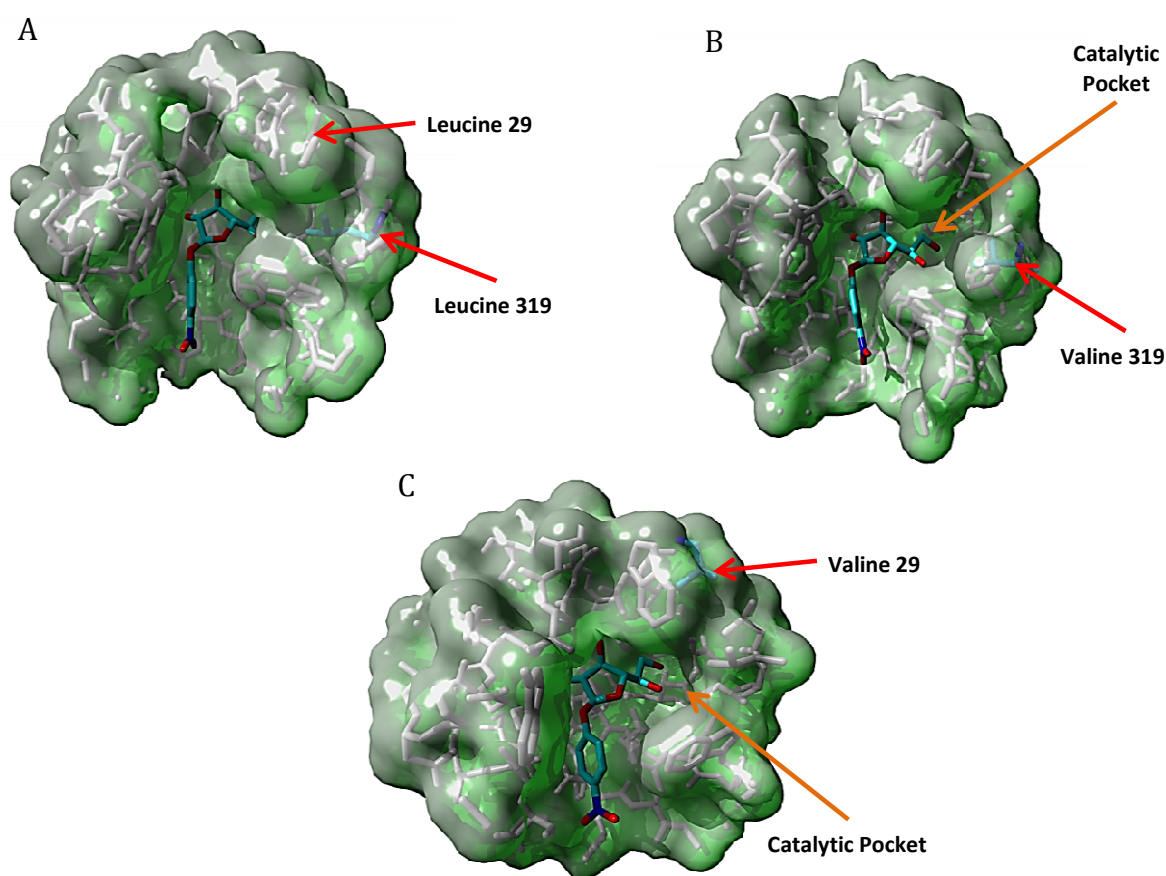

**Figure S3.** Docking of *pNP*-β-D-galactofuranoside in the active site of CtAraF51 WT (A); CtAraF51 L319V (B) and CtAraF51 L29V (C).

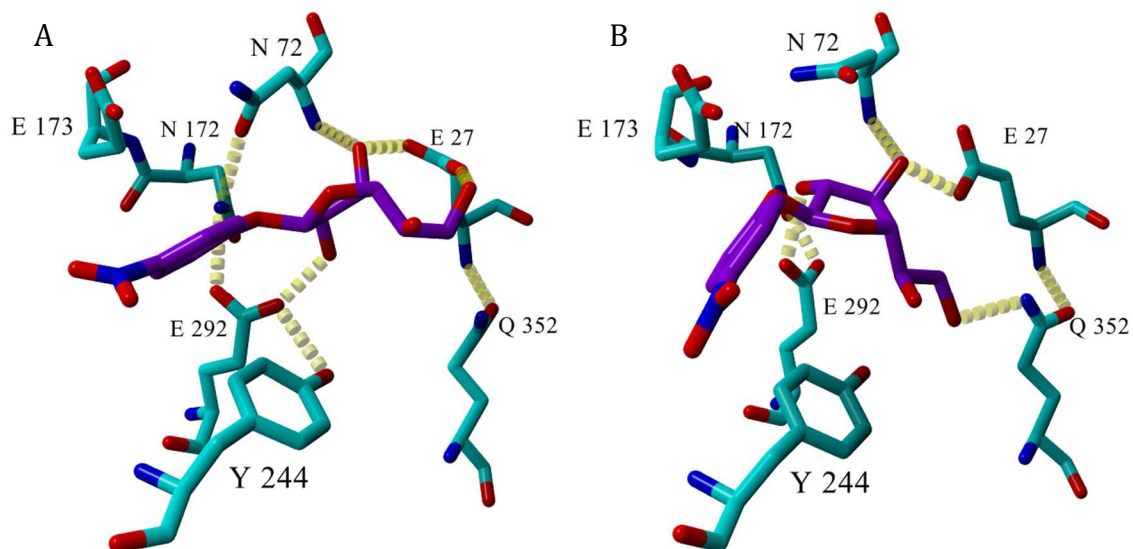

**Figure S4.** Hydrogen bond networks of the complexes *pNP-β-D-galactofuranoside/CtAraf51 L319V* (A) and *pNP-β-D-galactofuranoside/CtAraf51 L29V* (B) after a 10 ns MD.

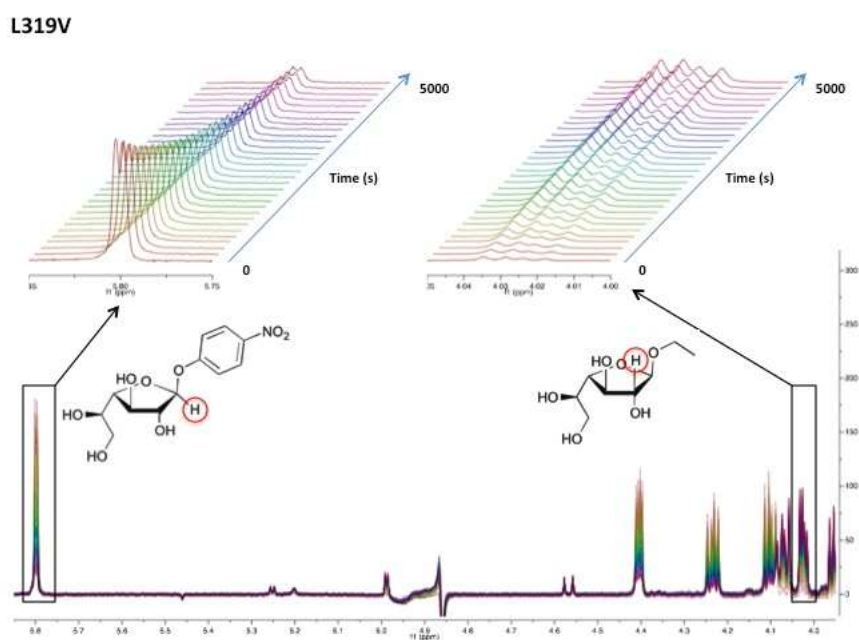

**Figure S5A.** NMR traces over time of the transglycosylation reaction using the L319V mutant as the biocatalyst.

L29V

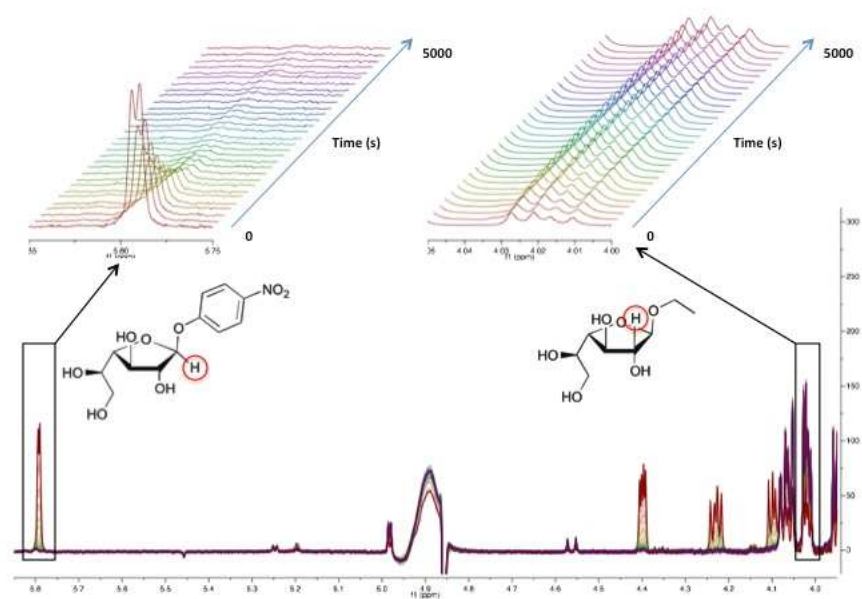

**Figure S5B.** NMR traces over time of the transglycosylation reaction using the L29V mutant as the biocatalyst.

CtAraf51 WT

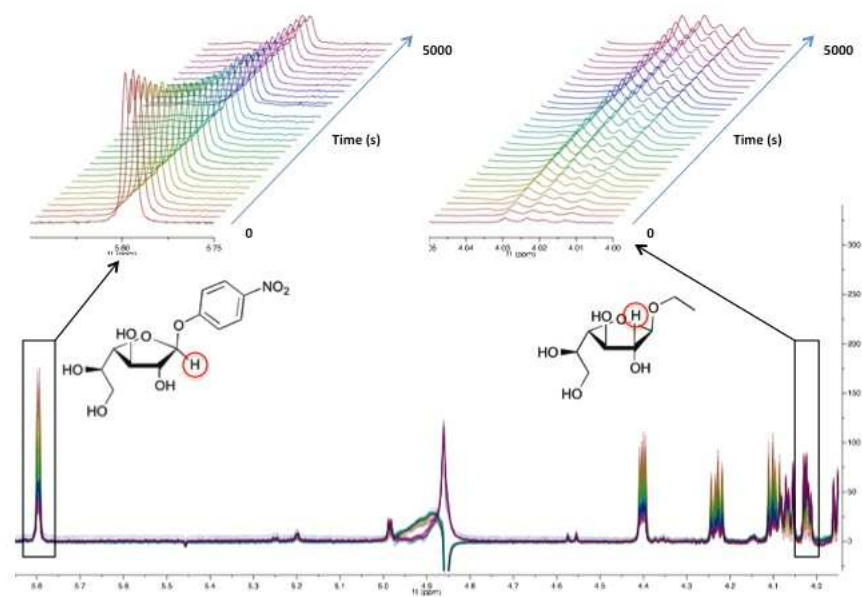

**Figure S5C.** NMR traces over time of the transglycosylation reaction using the WT CtAraf51 as the biocatalyst.

**E173A L319V**

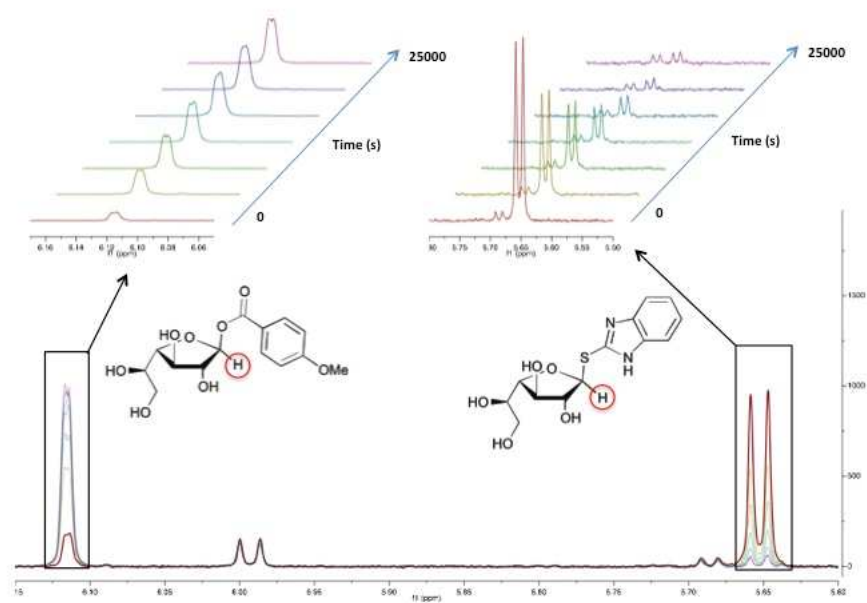

**Figure S6A.** NMR traces over time of the acylation reaction using the E173 L319V double mutant as the biocatalyst.

**E173A L29V**

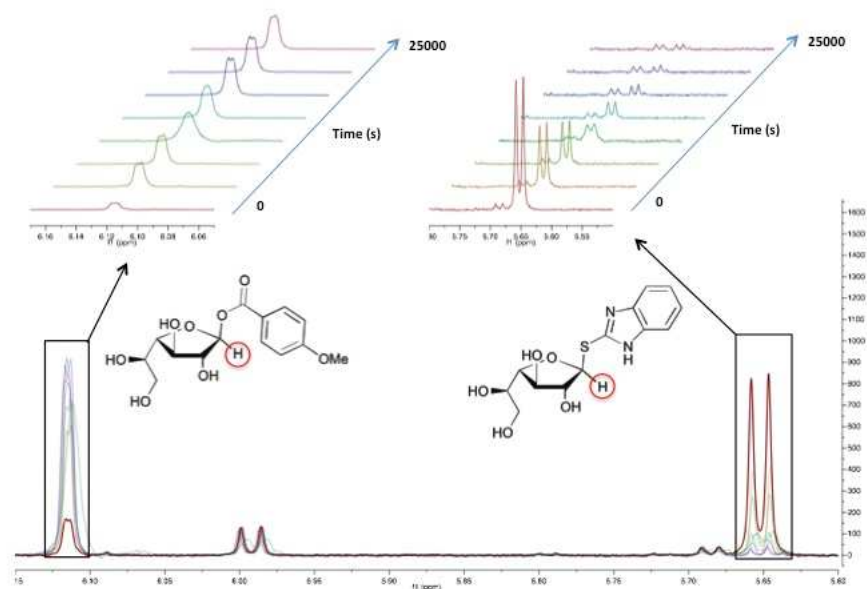

**Figure S6B.** NMR traces over time of the acylation reaction using the E173 L29V double mutant as the biocatalyst.



### E173A

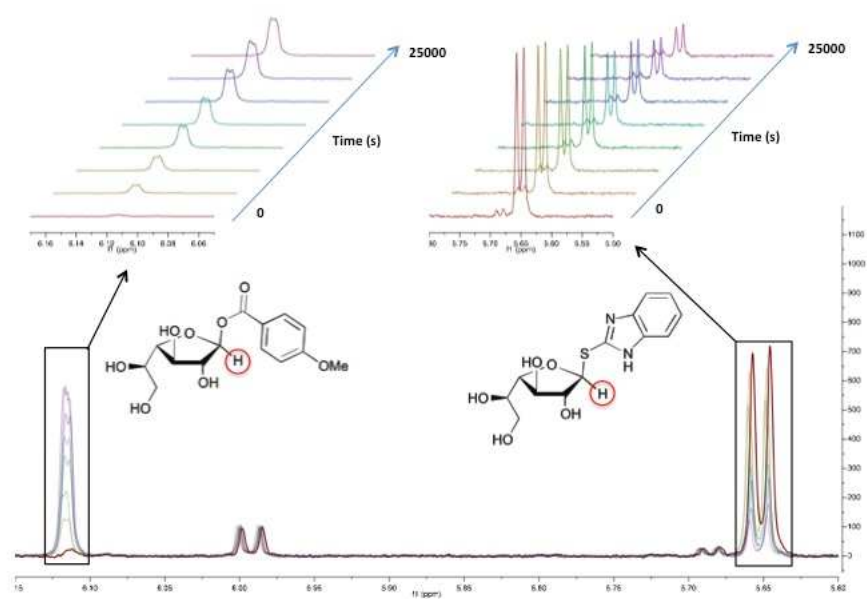

**Figure S6C.** NMR traces over time of the acylation reaction using the E173 mutant as the biocatalyst.

### E173A L319V

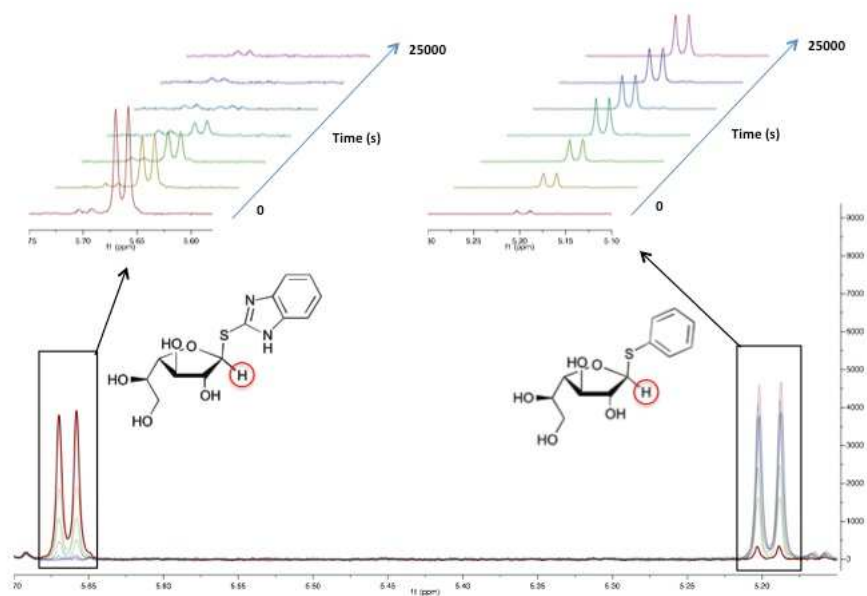

**Figure S7A.** NMR traces over time of the thioligation reaction using the E173A L319V double mutant as the biocatalyst.

### E173A L29V

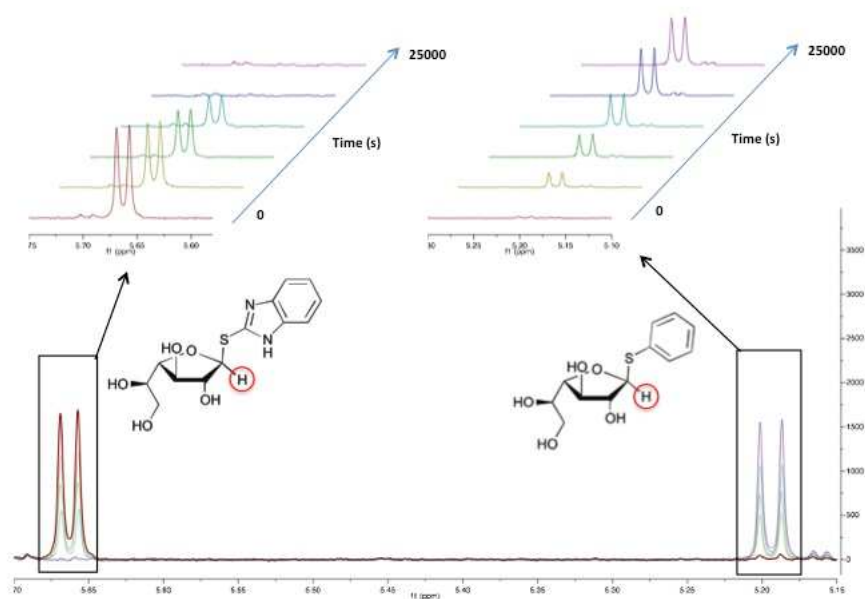

**Figure S7B.** NMR traces over time of the thioligation reaction using the E173A L29V double mutant as the biocatalyst.

### E173A

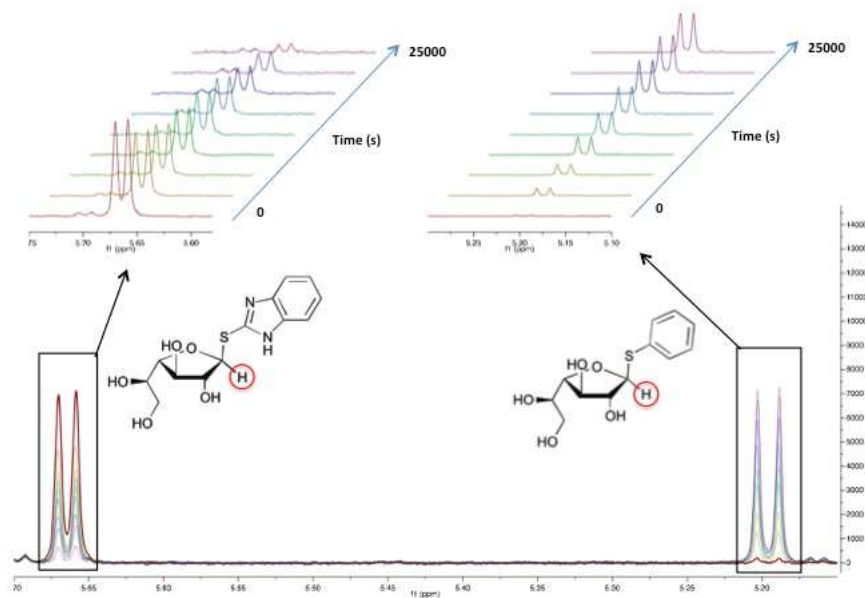

**Figure S7C.** NMR traces over time of the thioligation reaction using the E173A mutant as the biocatalyst.

$^1\text{H}$  and  $^{13}\text{C}$  NMR spectrum of isolated ethyl galactofuranoside **4**, *p*-methoxybenzoyl galactofuranose **6** and thiophenyl galactofuranoside **7**.

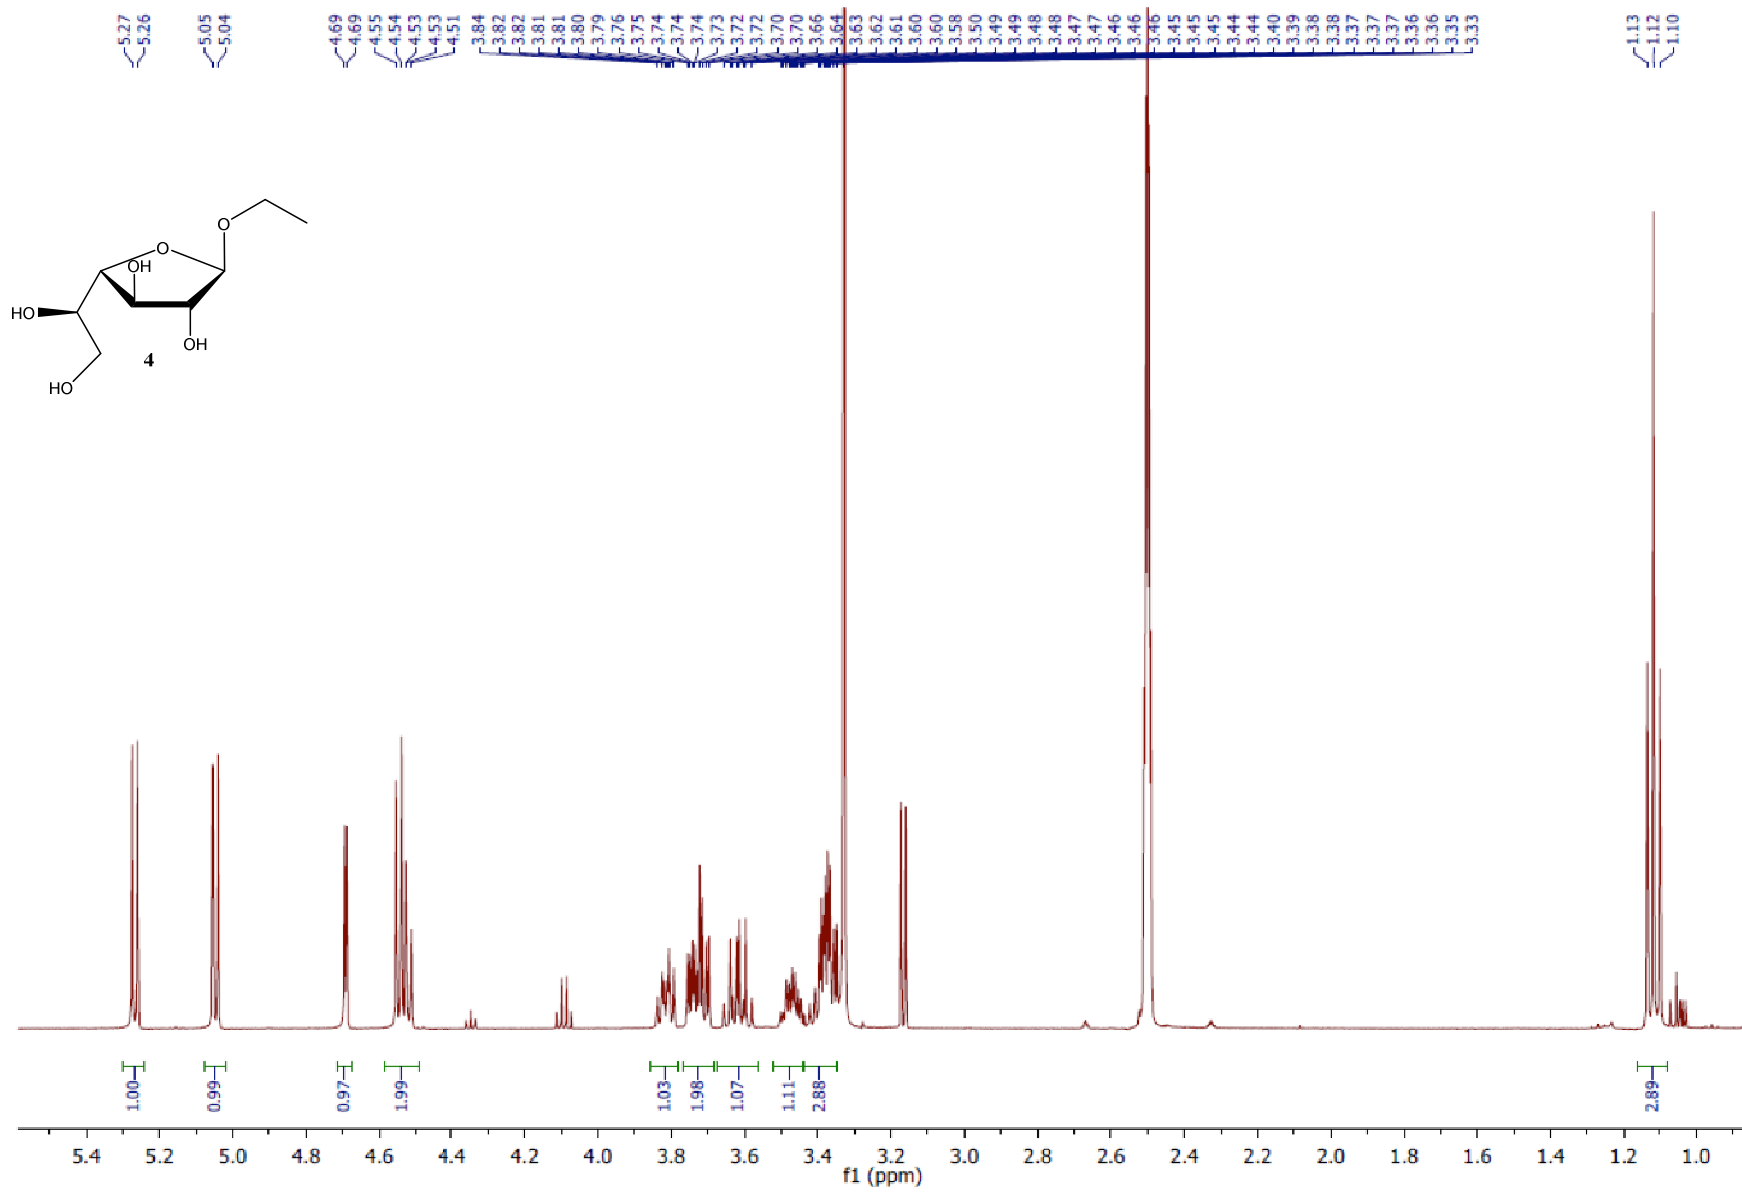

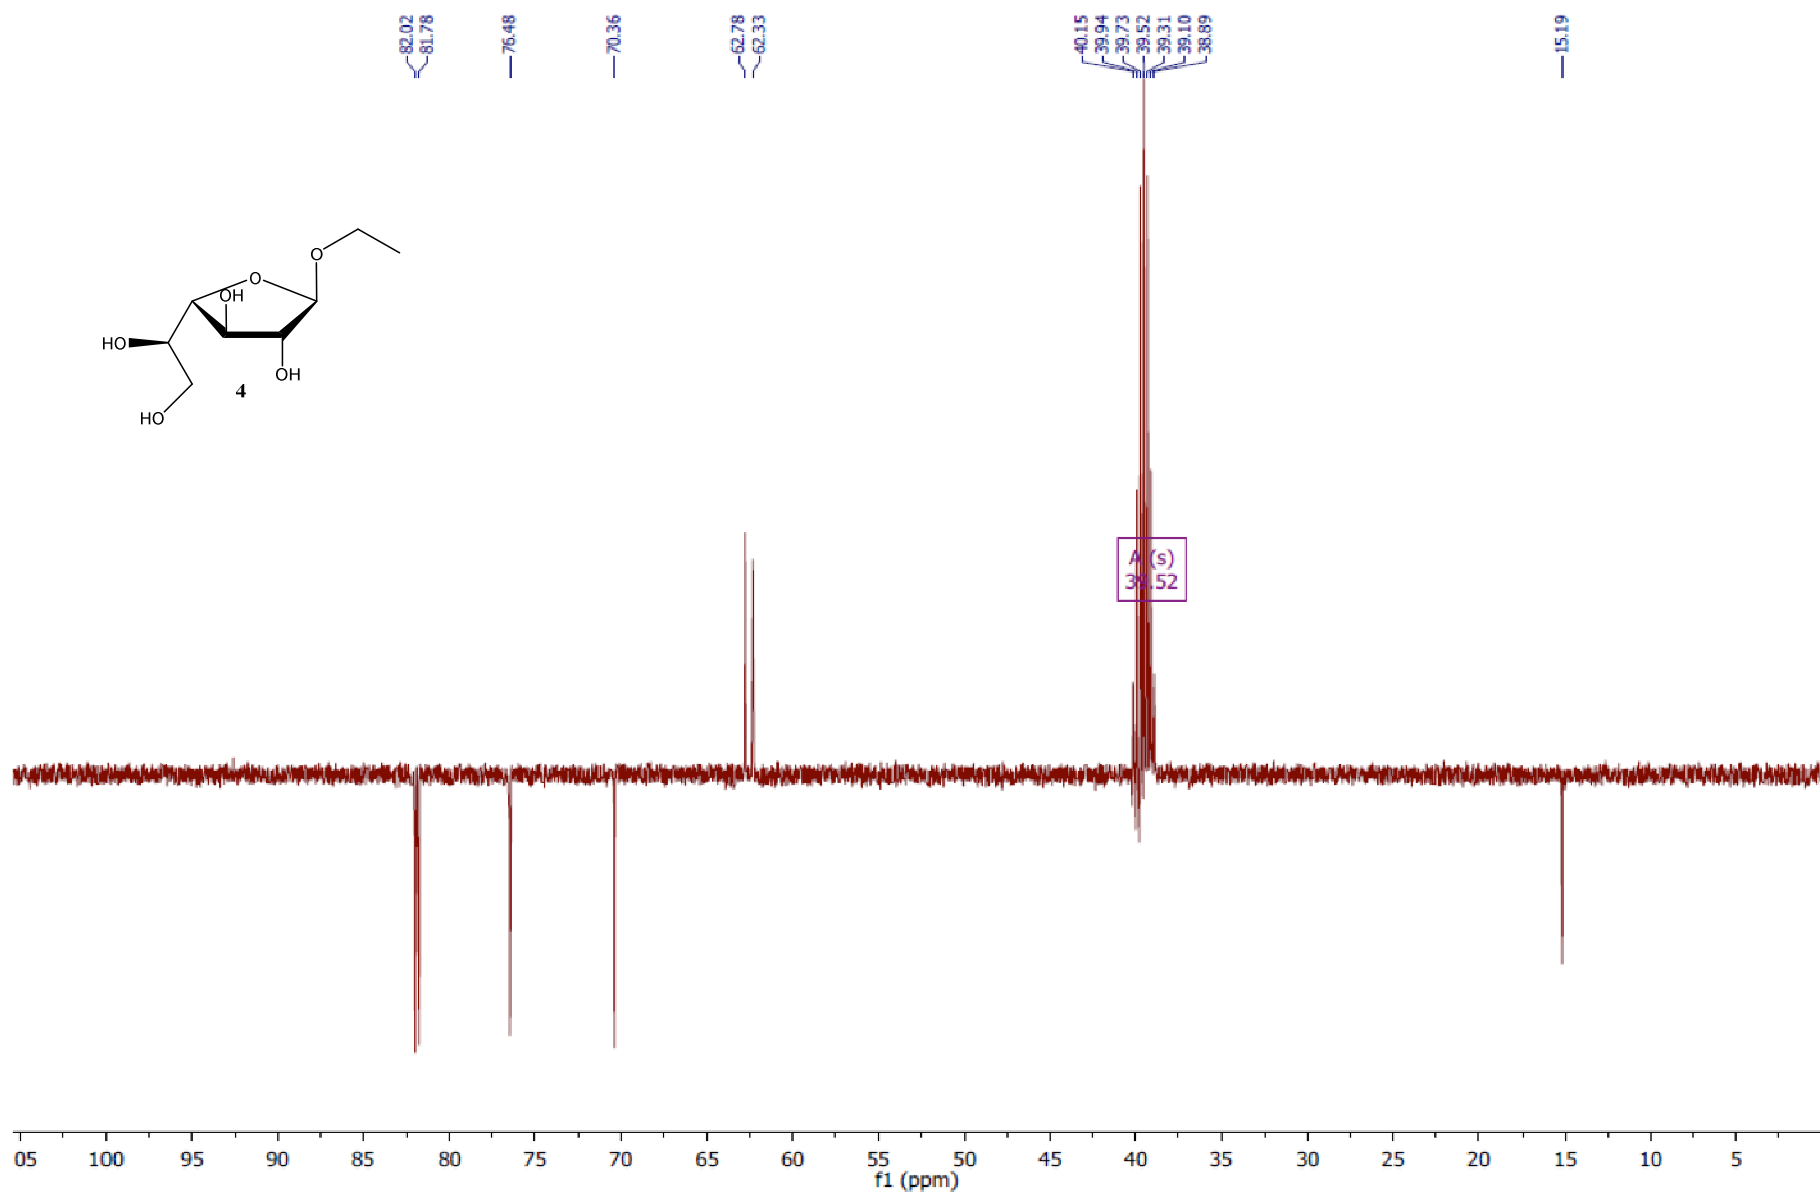

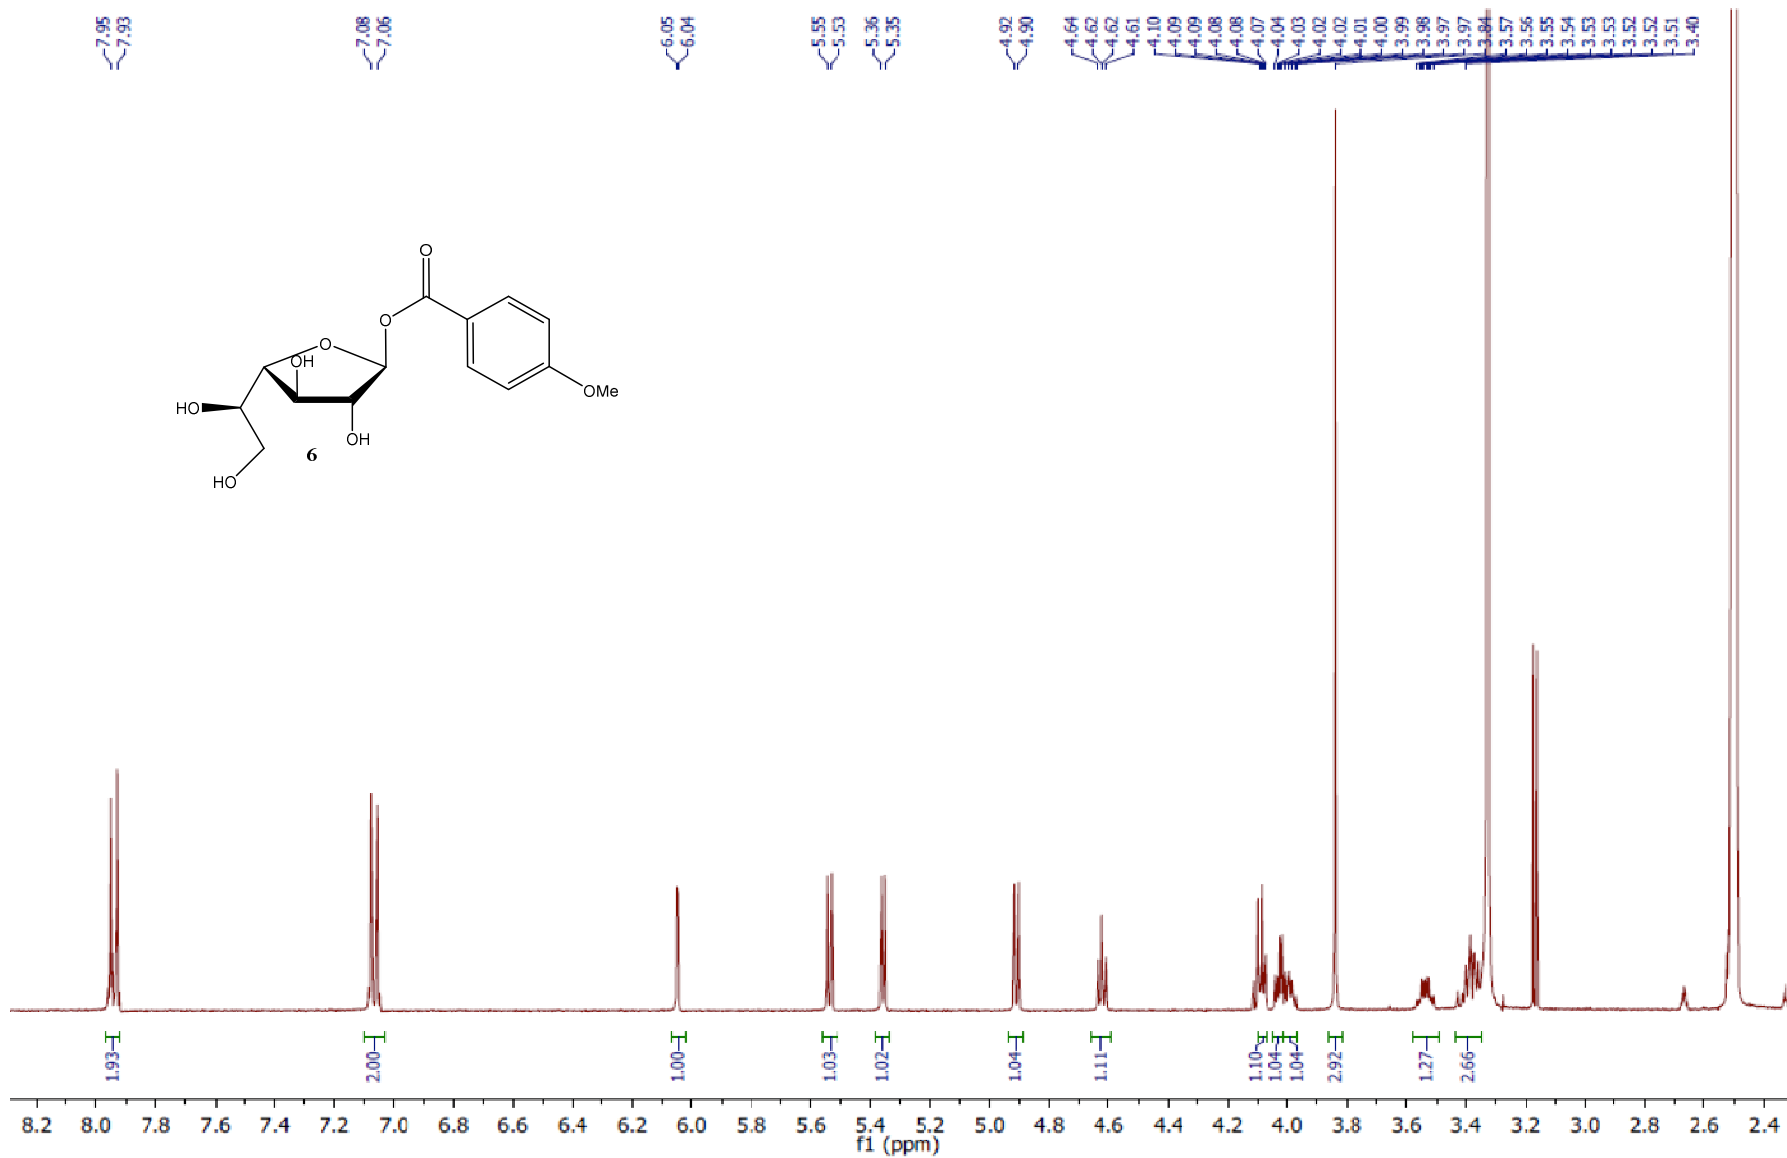

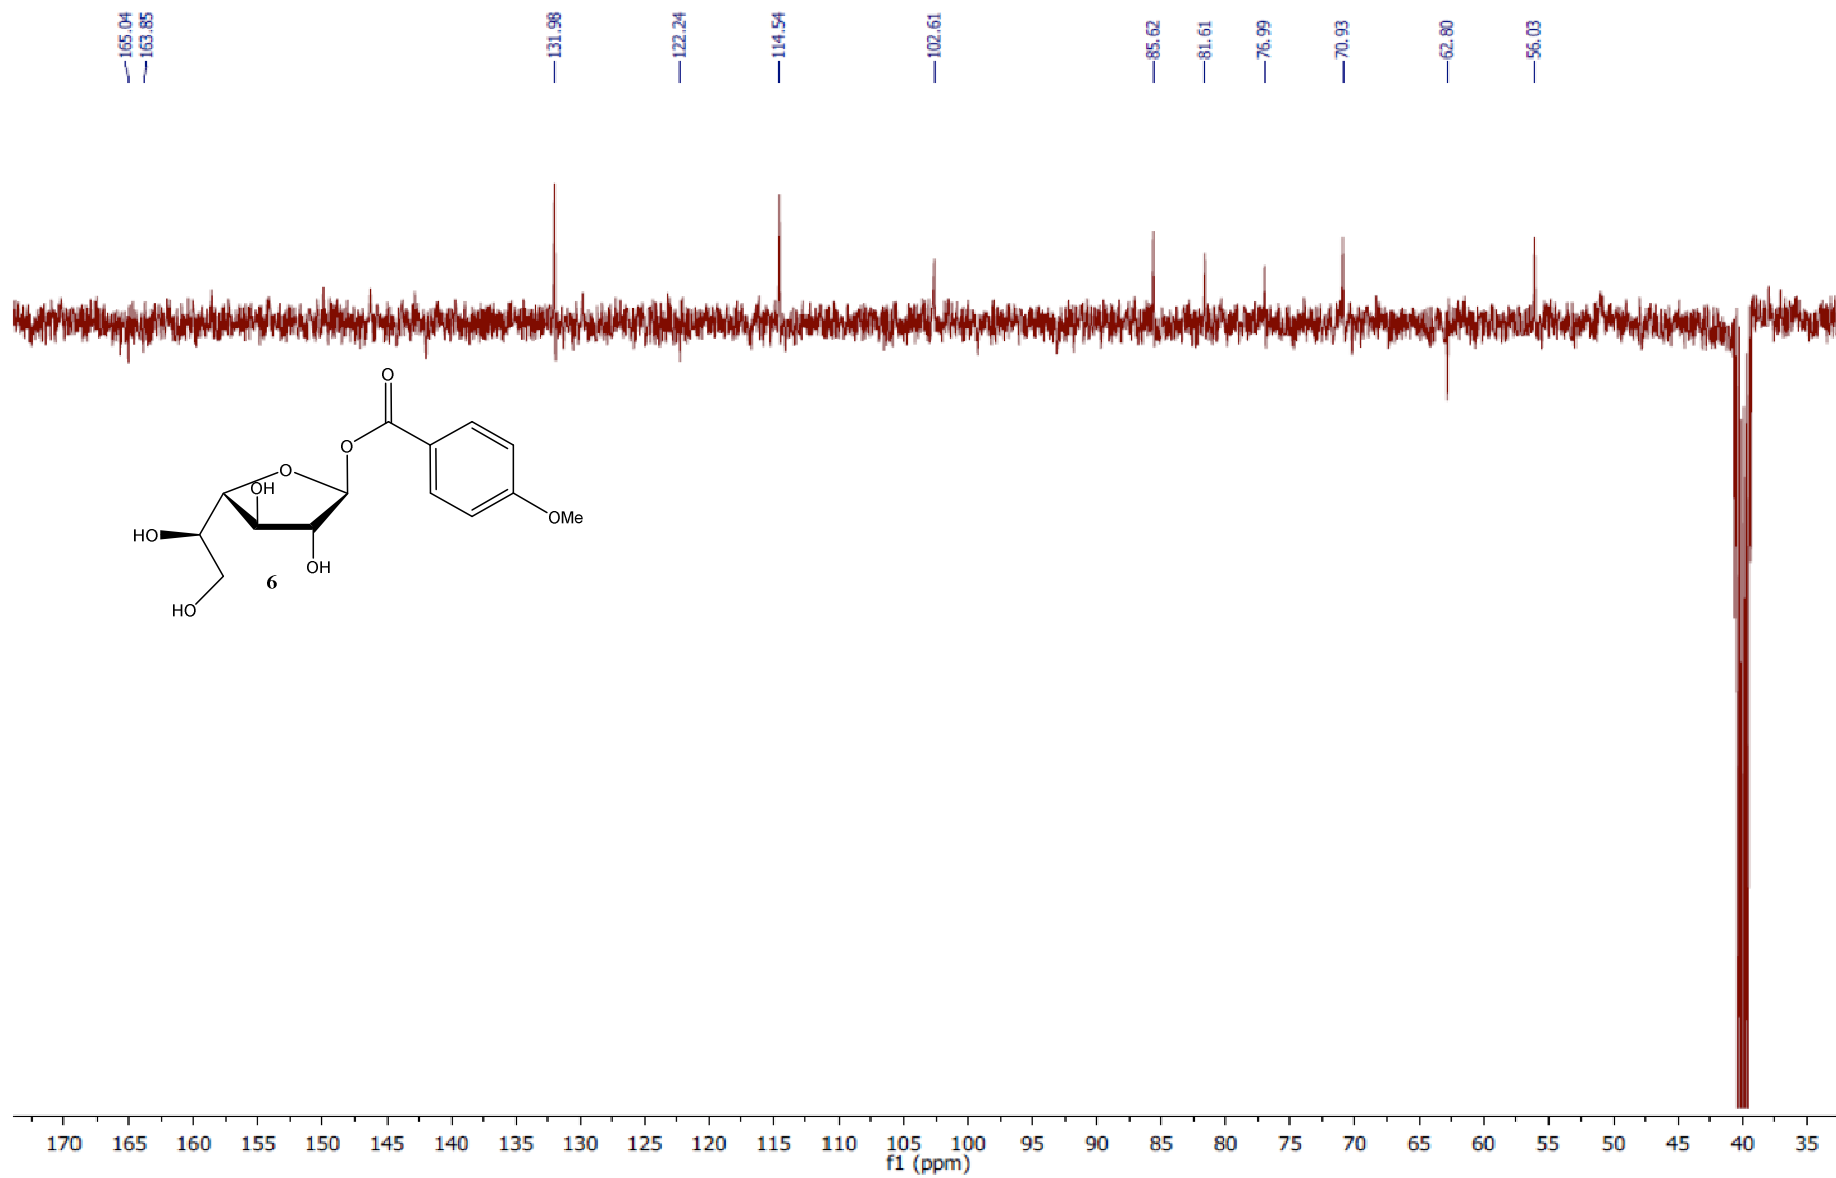

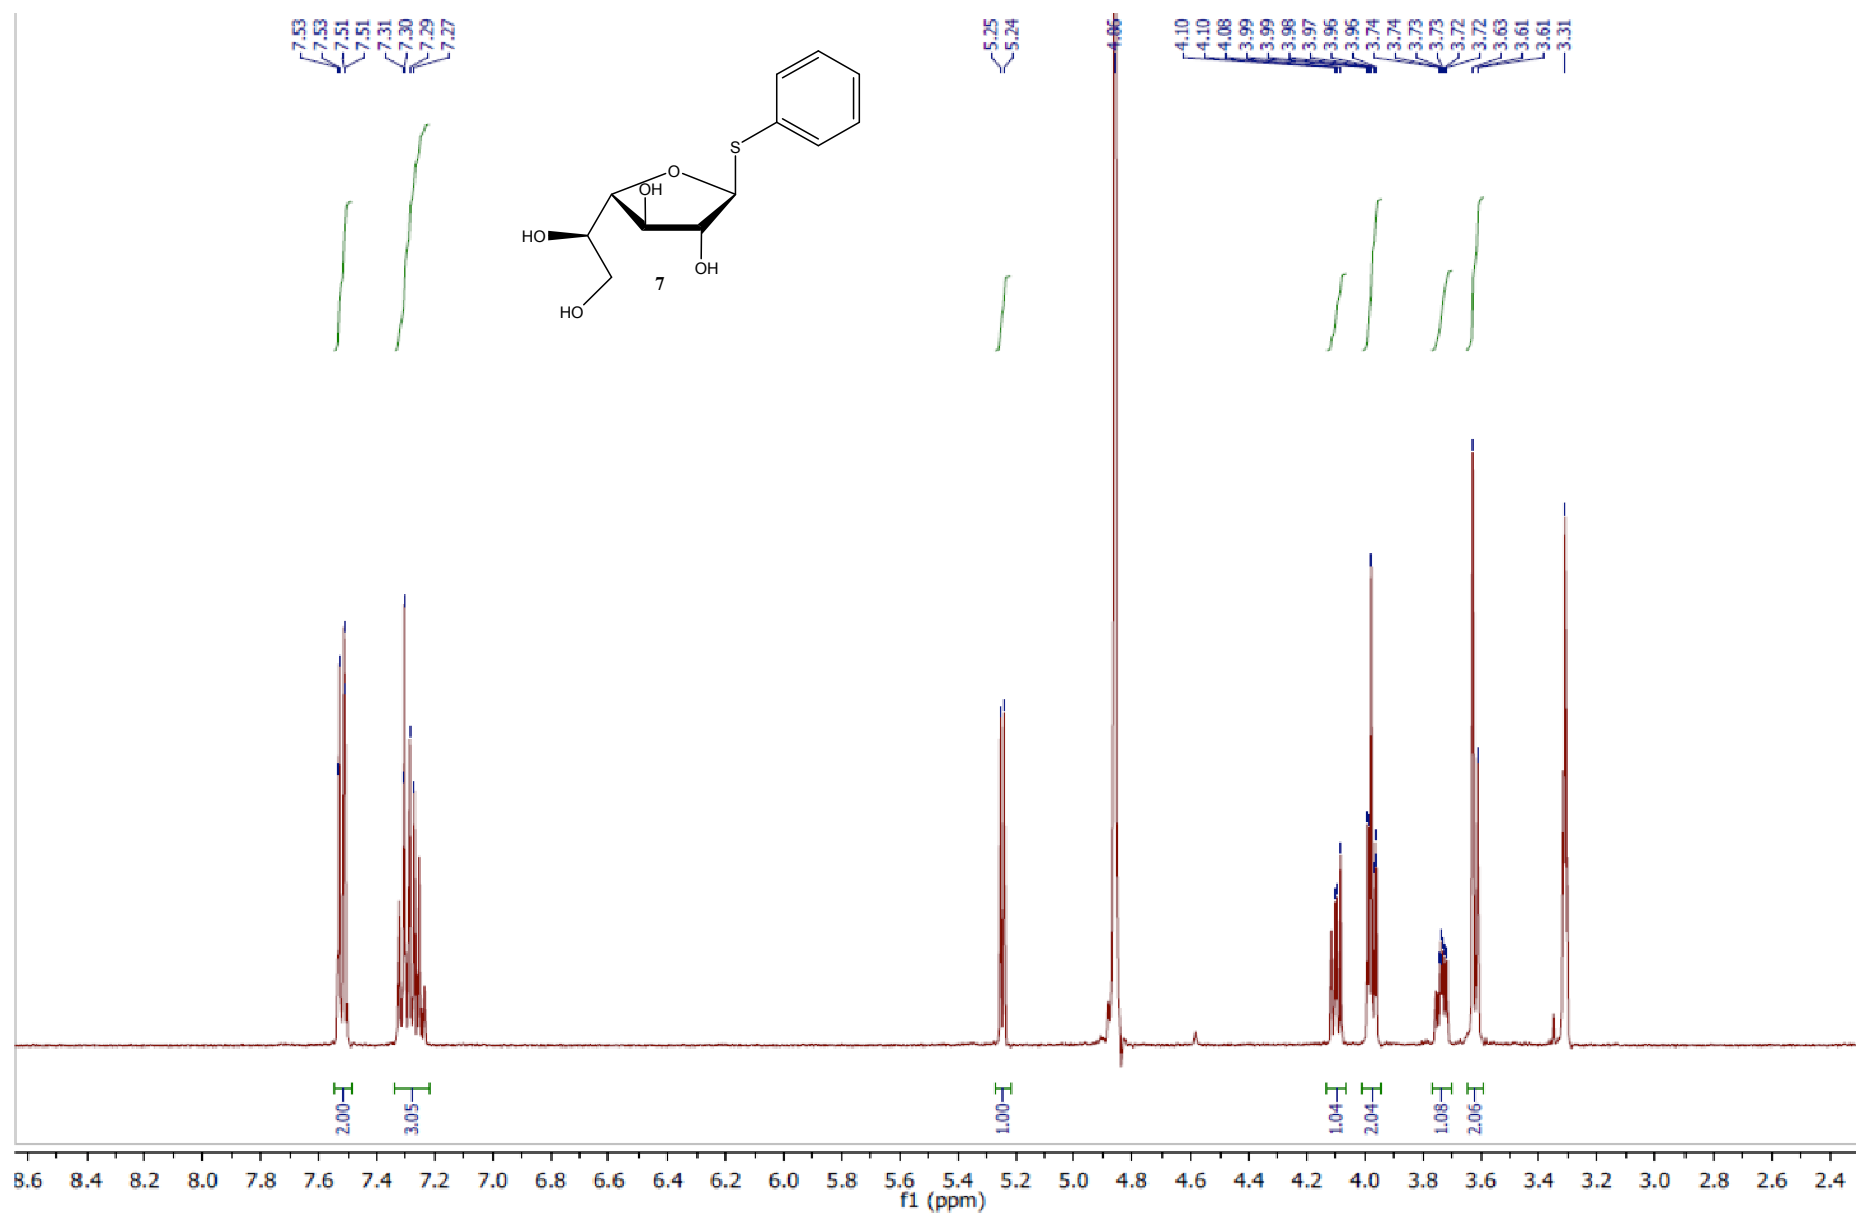



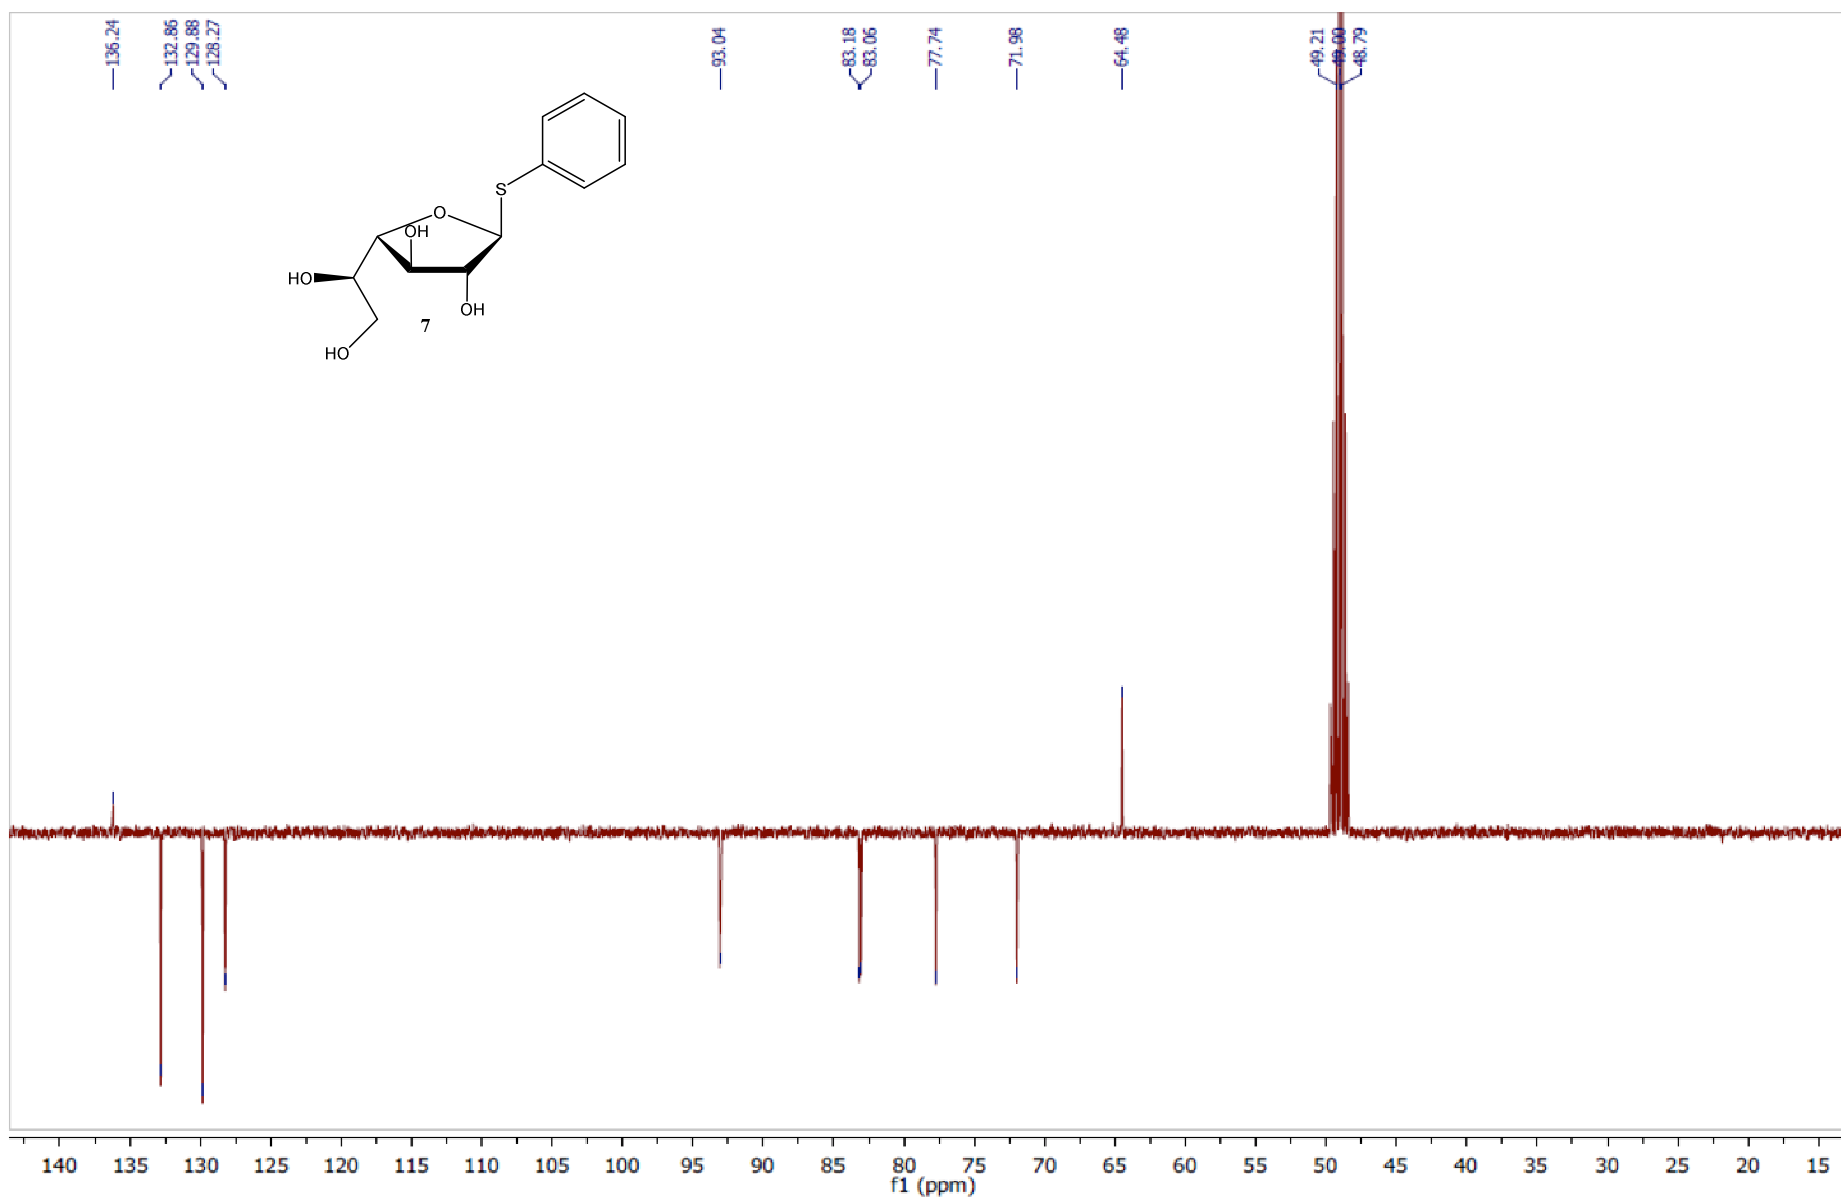

Supplement: c9ob01162e1.pdf [file c9ob01162e1.pdf]
